# Supplementary material for: Effect of a sexually transmitted infection prevention program on voluntary counseling and testing services utilization among university students: a quasi-experimental study
Source: Research Square preprint supplement (doi:10.21203/rs.3.rs-8307772/v1), 2026-01-19
Supplement: Supplementary file [file 38201d482d91541ebbf6be44.pdf]

Appendix 1: Matrices of changes for target group in the “*Take to opportunity to listen and to be listened to*” programme evaluation research

|                                                                                        |                                                                                                                                           |                                                                                    |                                                                                                                                         |                                                                             |               |                                                                                                                         |
|----------------------------------------------------------------------------------------|-------------------------------------------------------------------------------------------------------------------------------------------|------------------------------------------------------------------------------------|-----------------------------------------------------------------------------------------------------------------------------------------|-----------------------------------------------------------------------------|---------------|-------------------------------------------------------------------------------------------------------------------------|
|                                                                                        | <b>Behaviour:BO1. University students engage in protected sexual intercourse practices (i.e., consistently and correctly use condoms)</b> |                                                                                    |                                                                                                                                         |                                                                             |               |                                                                                                                         |
|                                                                                        | <b>Personal determinants</b>                                                                                                              |                                                                                    |                                                                                                                                         |                                                                             |               |                                                                                                                         |
| <b>Performance Objectives (University students)</b>                                    | <b>Knowledge</b>                                                                                                                          | <b>Risk perception</b>                                                             | <b>Attitude</b>                                                                                                                         | <b>Self-efficacy</b>                                                        | <b>Skills</b> | <b>Subjective norms</b>                                                                                                 |
| <b>PO1.1.</b> Students decide to use condom as the best mean of protection to STI/HIV. | K1.1.a. Describe means of protection against STI/HIV acquisition.                                                                         |                                                                                    | A1.1a. Express positive feeling regarding benefits of preventing STI.                                                                   | SE1.1.a. Express confidence in ability to prevent STI acquisition.          |               |                                                                                                                         |
|                                                                                        | K1.1b. Restate that using condom during sexual intercourse reduce the risk of acquiring STIs including HIV.                               | RP1.1.a Recognize that carrying an STI increase in 1/3 the chance to contract HIV. | A1.1.b. Express positive feeling regarding benefits of using condom consistently and correctly to reduce the risk of acquiring STI/HIV. | SE1.1.b. Express confidence in ability to make the decision to use condoms. |               | SN1.1.b. Recognize that most of sexually active students who decide to use condoms are more likely to use continuously. |

|                                                                                                                                                                      |                                                      |  |                                                                                |                                                                                                     |                                                                                     |                                                                                                                                 |
|----------------------------------------------------------------------------------------------------------------------------------------------------------------------|------------------------------------------------------|--|--------------------------------------------------------------------------------|-----------------------------------------------------------------------------------------------------|-------------------------------------------------------------------------------------|---------------------------------------------------------------------------------------------------------------------------------|
| <b>Continuation:</b> Matrices of changes for target group in the “ <i>Take to opportunity to listen and to be listened to</i> ” programme evaluation research _ BO 1 |                                                      |  |                                                                                |                                                                                                     |                                                                                     |                                                                                                                                 |
| <b>PO1.2.</b> Students locate condoms display points at health centre, health provider office, restrooms or at chemistry.                                            | K1.2.a. Name places to buy or obtain condoms.        |  |                                                                                | SE1.2.a. Express confidence in ability to buy or obtain condoms.                                    |                                                                                     | SN1.2.a. Recognise that other students obtain condoms for free at health centre, health provider office or by at the chemistry. |
|                                                                                                                                                                      |                                                      |  |                                                                                | SE1.2.b. Express confidence in ability to deal with embarrassment when buying or obtaining condoms. | S1.2.b. Demonstrate ability to deal with embarrassment when buying or take condoms. |                                                                                                                                 |
| <b>PO1.3.</b> Students negotiate the use of condom with partner stating mutual goals such as preventing STI/HIV transmission.                                        | K1.3.a. Record the steps of successful negotiation . |  | A1.3.a. Express positive feeling regarding benefits of successful negotiation. | SE1.3.a. Express confidence in ability to negotiate the use of condom with partner.                 | S1.3.a. Demonstrate ability to negotiate the use of condom with partner.            | SN1.3.a. Recognize that sexual active peer students negotiate the use of condom with their partner.                             |

Continuation: Matrices of changes for target group in the “Take to opportunity to listen and to be listened to” programme evaluation research \_ BO1

|                                                                                                                                                          |                                                             |                                                                                  |                                                                                                   |                                                                                                                                                                                               |                                                                                                                                |                                                                                                          |
|----------------------------------------------------------------------------------------------------------------------------------------------------------|-------------------------------------------------------------|----------------------------------------------------------------------------------|---------------------------------------------------------------------------------------------------|-----------------------------------------------------------------------------------------------------------------------------------------------------------------------------------------------|--------------------------------------------------------------------------------------------------------------------------------|----------------------------------------------------------------------------------------------------------|
| <b>PO1.4.</b> Students actively listen to their partner's concerns to use condom as a pre-condition for sex.                                             | K1.4.a. Define components of active listening to a partner. |                                                                                  | A1.4. a. Express positive feeling regarding benefits of respect to a partner's concerns.          | SE1.4.a. Express feeling confident in ability to listen actively a partner's concerns about pre-conditions for sex.                                                                           | S1.4.a. Demonstrate ability to listen actively to partner's concerns about pre-conditions for sex.                             | SN1.4.a Recognize that sexually active students actively listen and understand their partner's concerns. |
| <b>PO1.5.</b> Students apply condom correctly during use by using new condom at each event of intercourse and following structures for use and disposal. | K1.5.a. Describe how to correctly apply a condom.           | RP1.5.a. Discuss risk level of STI/HIV acquisition in unsafe sexual intercourse. | A1.5.a. Express positive feeling regarding advantages of using condom correctly and consistently. | SE1.5.a. Express feeling confident in ability to evaluate personal risk to STI/HIV acquisition<br><br>SE1.5.b. Express feeling confident in ability to use condom correctly and consistently. | S1.5.a. Demonstrate ability to perform their risk self-evaluation.<br><br>S1.5.b. Demonstrate ability to use condom correctly. | SN1.5.a. Recognize that sexually active students use condom correctly and consistently.                  |

|                                                                                                 |                                                                                                 |                                                                      |                                                                                          |                      |               |                         |
|-------------------------------------------------------------------------------------------------|-------------------------------------------------------------------------------------------------|----------------------------------------------------------------------|------------------------------------------------------------------------------------------|----------------------|---------------|-------------------------|
|                                                                                                 | <b>BO2. University students regularly use STI/HIV screening services</b>                        |                                                                      |                                                                                          |                      |               |                         |
|                                                                                                 | <b>Personal determinants</b>                                                                    |                                                                      |                                                                                          |                      |               |                         |
| <b>Performance objectives (University students)</b>                                             | <b>Knowledge</b>                                                                                | <b>Risk Perception</b>                                               | <b>Attitude</b>                                                                          | <b>Self-efficacy</b> | <b>Skills</b> | <b>Subjective norms</b> |
| <b>PO2.1.</b> Students locate STI/HIV screening service office at the faculty or health centre. | K2.1.a. Recognise symptoms of possible STI infection.                                           | RP2.1.a. Describe some conditions need to develop STI/HIV infection. | A2.1.a. Express positive feeling regarding benefits of STI/HIV adequate treatment.       |                      |               |                         |
|                                                                                                 | K2.1.b. List steps to follow in case suspect having any STI/HIV.                                | RP2.1.b. Discuss complications of untreated STI.                     |                                                                                          |                      |               |                         |
|                                                                                                 | K2.1.c. Recognize that attending STI/HIV screening test reduce spreading of STIs including HIV. |                                                                      | A2.1.b. Express positive feeling regarding benefits of using STI/HIV screening services. |                      |               |                         |

| Continuation: Matrices of changes for target group in the “Take to opportunity to listen and to be listened to” programme evaluation research _ BO2 |                                                                                                                                |                                                                                                                                                  |                                                                                                          |                                                                                                                                      |                                                                                                                          |                                                                                                         |
|-----------------------------------------------------------------------------------------------------------------------------------------------------|--------------------------------------------------------------------------------------------------------------------------------|--------------------------------------------------------------------------------------------------------------------------------------------------|----------------------------------------------------------------------------------------------------------|--------------------------------------------------------------------------------------------------------------------------------------|--------------------------------------------------------------------------------------------------------------------------|---------------------------------------------------------------------------------------------------------|
| PO2.2. Students setup a calendar for regular visit to the health advisor for counselling and testing to STI/HIV.                                    | K2.2.a. State the recommended time interval to regularly check or screening for STI/HIV.                                       | RP2.2.a. Describe burden of HIV in Mozambique and its epidemic course.<br><br>RP2.2.b. Recognize that they are at risk for STIs/HIV acquisition. | A2.2.a. Express positive feeling about benefits of setting up a personal calendar for STI/HIV screening. | SE2.2.a. Express confidence in ability to setup a calendar to visit a health provider services for STI/HIV counselling and testing.  | S2.2.a. Demonstrate ability to plan their time for STI/HIV check-up.                                                     | SN2.2.a. Recognise that they know other student who follows a personal calendary for STI/HIV screening. |
| PO2.3. Students visit a health advisor and present their concerns about STI/HIV.                                                                    | K2.3.a. Describe clinical aspect related to STI/HIV infection.<br><br>K2.3.b. Discuss stages of STI/HIV infection development. | RP2.3.a. Recognize that they should get help from a health advisor very soon.                                                                    | A2.3.a. Express positive feeling regarding benefits of getting help from health advisor soon.            | SE2.3.a. Express feeling confident to tell their concerns about STI/HIV to the health advisor.                                       | S2.3.b. Demonstrate ability to describe their concerns and/or symptoms.                                                  | SN2.3.a. Describe that they see other students going to the health advisor.                             |
|                                                                                                                                                     | K2.3.c. Describe myths and fears about STI/HIV testing.                                                                        |                                                                                                                                                  |                                                                                                          | SE2.3.b. Express confidence in ability to deal with fear of being judged (e.g. cheating) or having to inform current sexual partner. | S2.3.a. Demonstrate ability to use recommended words when talking about HIV concerns to avoid stigma and discrimination. |                                                                                                         |

**Continuation:** Matrices of changes for target group in the “*Take to opportunity to listen and to be listened to*” programme evaluation research \_ BO2

|                                                                                                          |                                                                                                 |                                                                                |                                                                                                                     |                                                                                                          |                                                       |                                                                                                        |
|----------------------------------------------------------------------------------------------------------|-------------------------------------------------------------------------------------------------|--------------------------------------------------------------------------------|---------------------------------------------------------------------------------------------------------------------|----------------------------------------------------------------------------------------------------------|-------------------------------------------------------|--------------------------------------------------------------------------------------------------------|
| PO2.4. Students agree and accept testing results and inform their sexual partner.                        | K2.4.a. Describe the STI/HIV testing process.                                                   | RP2.4.a. Discuss consequences of delay learning about their STI/HIV condition. | A2.4.a. Express positive feeling regarding benefits of learning about their test results.                           | SE2.4.a. Express confidence in ability to deal with test results emotional reactions                     |                                                       |                                                                                                        |
| PO2.5. Students with positive test results go to the referred health centre for treatment and follow up. | K2.5.a. Describe the effect of medicines used to treat STI including anti-retroviral medicines. | RP2.5.a. Discuss consequences of delay treatment of STI/HIV                    | A2.5.a. Express positive feeling regarding advantages of treatment and follow up for STI/HIV.                       | SE2.5.a. Express confidence in ability to go to the health centre for treatment and follow up if needed. |                                                       | SN2.5.a. Recognize that other people with STI/HIV go to the health centre for treatment and follow up. |
| PO2.6 Students follow their calendar continuously.                                                       |                                                                                                 |                                                                                | A2.6.a. Express positive feeling regarding regular visit to the health advisor for STI/HIV counselling and testing. | SE2.7.a. Express confidence in ability to follow their calendar continuously.                            | S2.7.a. Demonstrate ability to update their calendar. | SN2.7.a. Recognize that other students follow their calendar continuously.                             |
