# Supplementary material for: Effect of a sexually transmitted infection prevention program on voluntary counseling and testing services utilization among university students: a quasi-experimental study
Source: Research Square preprint supplement (doi:10.21203/rs.3.rs-8307772/v1), 2026-01-19
Supplement: Supplementary file [file 81344fa16edf14f78afd3d4c.pdf]

## Evaluation of a sexual transmitted infection prevention program among university students in Beira city, Central Mozambique

Name of data collector: \_\_\_\_\_ Date of filling: \_\_/\_\_/202\_\_

Collection setting (university/faculty/class) \_\_\_\_\_/\_\_\_\_\_/\_\_\_\_\_

Participant Identification Number \_\_/\_\_/\_\_ Number of visit: 0\_\_ 1\_\_ 2\_\_

### Section 1: Sociodemographic and living characteristics

| QN.  | Question                                | Code of possible answers                                                                              | Pass   |
|------|-----------------------------------------|-------------------------------------------------------------------------------------------------------|--------|
| Q101 | What is your sex?                       | Female 1<br>Male 2                                                                                    |        |
| Q102 | How old were you at your last birthday? | Years of old <input type="text"/> <input type="text"/>                                                |        |
| Q103 | What is your religion?                  | None 1<br>Catholic 2<br>Methodist 3<br>Anglican 4<br>Muslim 5<br>Hindu 6<br>Other .....7<br>(Specify) | → Q105 |

|      |                                                                                                   |                                                                                |                            |        |
|------|---------------------------------------------------------------------------------------------------|--------------------------------------------------------------------------------|----------------------------|--------|
| Q104 | How often do you attend religious activities?                                                     | Never<br>Almost never<br>Some days/occasionally<br>Almost everyday<br>Everyday | 1<br>2<br>3<br>4<br>5      |        |
| Q105 | <b>Now we invite you to answer some questions about your family!</b><br><br>Is your father alive? | Yes<br>No                                                                      | 1<br>2                     | → Q109 |
| Q106 | Does he live in the same household as you?                                                        | Yes<br>No                                                                      | 1<br>2                     |        |
| Q107 | Do you find it difficult to talk with your father about important things for you?                 | Very difficult<br>Difficult<br>Neutral<br>Easy<br>Very easy<br>Do not see him  | 1<br>2<br>3<br>4<br>5<br>6 | → Q109 |
| Q108 | Have you ever discussed sexuality-related matters with your father? If YES, how often.            | Never<br>Rarely<br>Occasionally<br>A moderate amount<br>A great deal           | 1<br>2<br>3<br>4<br>5      |        |

|      |                                                                                           |                   |   |        |
|------|-------------------------------------------------------------------------------------------|-------------------|---|--------|
| Q109 | Is your mother alive?                                                                     | Yes               | 1 | → Q201 |
|      |                                                                                           | No                | 2 |        |
| Q110 | Does she live in the same household as you?                                               | Yes               | 1 |        |
|      |                                                                                           | No                | 2 |        |
| Q111 | Do you find it difficult or easy to talk with your mother about important things for you? | Very difficult    | 1 |        |
|      |                                                                                           | Difficult         | 2 |        |
|      |                                                                                           | Neutral           | 3 |        |
|      |                                                                                           | Easy              | 4 |        |
|      |                                                                                           | Very easy         | 5 |        |
|      |                                                                                           | Do not see her    | 6 |        |
| Q112 | Have you ever discussed sexuality-related matters with your mother? If YES, how often.    | Never             | 1 |        |
|      |                                                                                           | Rarely            | 2 |        |
|      |                                                                                           | Occasionally      | 3 |        |
|      |                                                                                           | A moderate amount | 4 |        |
|      |                                                                                           | A great deal      | 5 |        |

## Evaluation of a sexual transmitted infection prevention programme among university students in Beira city, Central Mozambique

Name of data collector: \_\_\_\_\_ Date of filling: \_\_/\_\_/202\_\_

Collection setting (university/faculty/class) \_\_\_\_\_/\_\_\_\_\_/\_\_\_\_\_

Participant code number \_\_/\_\_/\_\_ Visit number: 0 \_\_ 1\_\_ 2 \_\_

### Section 2: Current or most recent heterosexual relationship

| QN.                                                            | Question                                                                                                                                                | Code of possible answer                                | Pass   |
|----------------------------------------------------------------|---------------------------------------------------------------------------------------------------------------------------------------------------------|--------------------------------------------------------|--------|
|                                                                |                                                                                                                                                         |                                                        |        |
| Q201                                                           | Have you ever had a boy/girlfriend? By girl/boyfriend we mean someone to whom you were sexually or emotionally attracted and whom you are in love with. | Yes 1<br>No 2                                          | → Q214 |
| Q202                                                           | How many girl/boy friends have you had?                                                                                                                 | Number <input type="text"/> <input type="text"/>       |        |
| Answer the following questions about current girl / boy friend |                                                                                                                                                         |                                                        |        |
| Q203                                                           | How old is your current girl / boyfriend?                                                                                                               | Age in years <input type="text"/> <input type="text"/> |        |
| Q204                                                           | When you become in love with your girl / boyfriend was she/he single, married, divorced or separated?                                                   | Single 1<br>Married 2<br>Divorce/Separate 3            |        |

|      |                                                                                                                                                                          |                                      |   |        |
|------|--------------------------------------------------------------------------------------------------------------------------------------------------------------------------|--------------------------------------|---|--------|
|      |                                                                                                                                                                          | Widow                                | 4 |        |
| Q205 | When you become in love with your girl / boyfriend was she/ he a full-time student, working or neither?                                                                  | Full time student                    | 1 |        |
|      |                                                                                                                                                                          | Working                              | 2 |        |
|      |                                                                                                                                                                          | Neither                              | 3 |        |
| Q206 | How would you describe your relationship with your current lover? Is it a) casual friendship; b) a serious relationship; or c) an important that might lead to marriage? | (a) Casual                           | 1 |        |
|      |                                                                                                                                                                          | (b) Serious                          | 2 |        |
|      |                                                                                                                                                                          | (c) Important/might lead to marriage | 3 |        |
|      |                                                                                                                                                                          | (d) Engaged to be married            | 4 |        |
|      |                                                                                                                                                                          | (e) The relationship ended           | 5 |        |
| Q207 | How do you think your lover would describe her/his relationship to you?                                                                                                  |                                      |   |        |
|      | a) as casual friendship; b) a serious relationship but with no intention of marriage; or c) an important that might lead to marriage?                                    | (a) Casual                           | 1 |        |
|      |                                                                                                                                                                          | (b) Serious                          | 2 |        |
|      |                                                                                                                                                                          | (c) Important/might lead to marriage | 3 |        |
|      |                                                                                                                                                                          | (d) Engaged to be married            | 4 |        |
| Q208 | Have you ever had sexual intercourse with your lover?                                                                                                                    | Yes                                  | 1 |        |
|      |                                                                                                                                                                          | No                                   | 2 | → Q214 |
| Q209 | Remember about the last time you had sex with your lover, would you say:                                                                                                 |                                      |   |        |
|      | a) I forced she/he to have intercourse against her/his will.                                                                                                             | a) I forced                          | 1 |        |
|      | b) Persuaded she/he to have intercourse.                                                                                                                                 | b) I persuaded                       | 2 |        |
|      | c) She/he persuaded me to have intercourse.                                                                                                                              | c) She/he persuaded                  | 3 |        |
|      | d) She/he forced me to have intercourse.                                                                                                                                 | d) She/he forced                     | 4 |        |
|      | e) We were both equally willing.                                                                                                                                         | e) Both Willing                      | 5 |        |

| Q210    | How old were you at the time you first had sex intercourse in your life?                                                                                                                                                                                                                                                               | Age in years <input type="text"/> <input type="text"/>                                                                                                                                                                                                                                                             |         |               |          |   |   |   |   |   |   |   |   |   |   |   |   |  |
|---------|----------------------------------------------------------------------------------------------------------------------------------------------------------------------------------------------------------------------------------------------------------------------------------------------------------------------------------------|--------------------------------------------------------------------------------------------------------------------------------------------------------------------------------------------------------------------------------------------------------------------------------------------------------------------|---------|---------------|----------|---|---|---|---|---|---|---|---|---|---|---|---|--|
| Q211    | Were you ever concerned that you might catch HIV/AIDS or another STI/STD from your lover? If YES, very, or somewhat?                                                                                                                                                                                                                   | Very concerned 1<br>Somewhat concerned 2<br>Not concerned 3                                                                                                                                                                                                                                                        |         |               |          |   |   |   |   |   |   |   |   |   |   |   |   |  |
| Q212    | Were you able to do anything to reduce the risk of acquiring any infection?                                                                                                                                                                                                                                                            | Yes 1<br>No 2                                                                                                                                                                                                                                                                                                      |         |               |          |   |   |   |   |   |   |   |   |   |   |   |   |  |
| Q213    | What did you do?                                                                                                                                                                                                                                                                                                                       | Use condom 1<br>Take medicine 2<br>Other 3<br>.....<br>(Specify)                                                                                                                                                                                                                                                   |         |               |          |   |   |   |   |   |   |   |   |   |   |   |   |  |
|         | <b>NOTE! Q214 and Q215 only for who did not engage in sexual activities yet!</b>                                                                                                                                                                                                                                                       |                                                                                                                                                                                                                                                                                                                    |         |               |          |   |   |   |   |   |   |   |   |   |   |   |   |  |
| Q214    | People may have many reasons for not having sexual intercourse. If that is your case, please tell us for each reason whether it applies to you or not:<br><br>a) I do not feel ready to have sex.<br><br>b) I have not had the opportunity.<br><br>c) I think sex before marriage is wrong.<br><br>d) I am afraid of getting pregnant. | <table border="0"> <thead> <tr> <th>Applies</th> <th>Doesn't apply</th> <th>Not sure</th> </tr> </thead> <tbody> <tr> <td>1</td> <td>2</td> <td>3</td> </tr> </tbody> </table> | Applies | Doesn't apply | Not sure | 1 | 2 | 3 | 1 | 2 | 3 | 1 | 2 | 3 | 1 | 2 | 3 |  |
| Applies | Doesn't apply                                                                                                                                                                                                                                                                                                                          | Not sure                                                                                                                                                                                                                                                                                                           |         |               |          |   |   |   |   |   |   |   |   |   |   |   |   |  |
| 1       | 2                                                                                                                                                                                                                                                                                                                                      | 3                                                                                                                                                                                                                                                                                                                  |         |               |          |   |   |   |   |   |   |   |   |   |   |   |   |  |
| 1       | 2                                                                                                                                                                                                                                                                                                                                      | 3                                                                                                                                                                                                                                                                                                                  |         |               |          |   |   |   |   |   |   |   |   |   |   |   |   |  |
| 1       | 2                                                                                                                                                                                                                                                                                                                                      | 3                                                                                                                                                                                                                                                                                                                  |         |               |          |   |   |   |   |   |   |   |   |   |   |   |   |  |
| 1       | 2                                                                                                                                                                                                                                                                                                                                      | 3                                                                                                                                                                                                                                                                                                                  |         |               |          |   |   |   |   |   |   |   |   |   |   |   |   |  |

|      |                                                                                                                                                                                                                                                                                                                                                                              |                |   |   |  |
|------|------------------------------------------------------------------------------------------------------------------------------------------------------------------------------------------------------------------------------------------------------------------------------------------------------------------------------------------------------------------------------|----------------|---|---|--|
|      | e) I am afraid of getting STI/STD or HIV/AIDS.                                                                                                                                                                                                                                                                                                                               | 1              | 2 | 3 |  |
| Q214 | <b>Now we would like to know about your future plan regarding sexual intercourse. Please indicate which of these statements best describe your plans:</b><br><br>a) I plan to wait until marriage.<br>b) I plan until I am engaged to be married.<br>c) I plan to wait until I find someone I love.<br>d) I plan to have sexual intercourse when an opportunity comes along. |                |   |   |  |
|      |                                                                                                                                                                                                                                                                                                                                                                              | a) Marriage    |   | 1 |  |
|      |                                                                                                                                                                                                                                                                                                                                                                              | b) Engaged     |   | 2 |  |
|      |                                                                                                                                                                                                                                                                                                                                                                              | c) Lover       |   | 3 |  |
|      |                                                                                                                                                                                                                                                                                                                                                                              | d) Opportunity |   | 4 |  |

## Evaluation of a sexual transmitted infection prevention programme among university students in Beira city, Central Mozambique

Name of data collector: \_\_\_\_\_ Date of filling: \_\_/\_\_/202\_\_

Collection setting (university/faculty/class) \_\_\_\_\_/\_\_\_\_\_/\_\_\_\_\_

Participant code number \_\_/\_\_/\_\_ Visit number: 0 \_\_ 1 \_\_ 2 \_\_

### Section 3: BO1. University students engage in safe sexual intercourse practices (i.e., consistently and correctly use condoms)

| QN.      | Question                                                                                                     | Code of possible answer                                                                                                                                           |
|----------|--------------------------------------------------------------------------------------------------------------|-------------------------------------------------------------------------------------------------------------------------------------------------------------------|
|          | <b>Now we are inviting you to answer some question regarding your knowledge about condom use.</b>            |                                                                                                                                                                   |
| Q.K1.1.a | What of these are consequences of not using condom at any sexual intercourse? (circle all possible answers). | Acquire tuberculosis 1<br>Acquire Syphilis 2<br>Acquire gonorrhoea 3<br>Acquire HIV 4<br>Acquire any STI/STD 5<br>Become pregnant/Make pregnant your girlfriend 6 |
| Q.K1.1.b | Using condom during sexual intercourse eliminate completely the risk of acquiring STI/STD including HIV.     | Yes 1<br>No 2<br>Do not know 3                                                                                                                                    |



|          |                                                                                                                                                                                 |                                                                                                                                                       |
|----------|---------------------------------------------------------------------------------------------------------------------------------------------------------------------------------|-------------------------------------------------------------------------------------------------------------------------------------------------------|
| Q.K1.2.a | Where do think that you can buy or obtain condom? <b>(select all possible place).</b>                                                                                           | At the health centre 1<br>At supermarket 2<br>In the health advisor office 3<br>At informal market 4<br>At the chemistry 5<br>Other 6<br>Specify..... |
| Q.K1.3.a | Where could you keep condoms that you consider private and effective for you to use in case you have sexual intercourse? <b>(select all possible place).</b>                    | In my wallet 1<br>In my school bag 2<br>In my pocket 3<br>In my purse 4<br>In my bookshelves 5<br>Under my pillow 6<br>Other places 7<br>Specify..... |
| Q.K1.3.b | Condoms have lifetime, but it is not necessary to check its validity before obtaining or use, because the provider does it for the clients.                                     | Yes 1<br>No 2<br>Don't know 3                                                                                                                         |
| Q.K1.4.a | Which of these statements are steps of negotiation for condom use?<br><br>a) Ask your partner if he/she willing to use condom.<br>b) Brainstorm about benefits of using condom. | <br><br>a) Ask your partner 1<br>b) Discuss benefits 2                                                                                                |

|          |                                                                                                                                                                                                                                                                                                                                                                                                                                                                                                                                                                             |                                                                                                                                                                                         |
|----------|-----------------------------------------------------------------------------------------------------------------------------------------------------------------------------------------------------------------------------------------------------------------------------------------------------------------------------------------------------------------------------------------------------------------------------------------------------------------------------------------------------------------------------------------------------------------------------|-----------------------------------------------------------------------------------------------------------------------------------------------------------------------------------------|
|          | c) Persuasive argument and actively listening.<br>d) Making consensus and getting agreement.<br>e) Keep your opinion fixed.                                                                                                                                                                                                                                                                                                                                                                                                                                                 | c) Persuasive and listen 3<br>d) Consensus/agreement 4<br>e) Fixed opinion 5<br>f) No idea 6                                                                                            |
| Q.K1.6.a | Actively listen consist of:<br><br><b>Select all possible characteristics.</b>                                                                                                                                                                                                                                                                                                                                                                                                                                                                                              | Hearing without replay to 1<br>Understand the message 2<br>Serious facial expression 3<br>Eye contact 4<br>No idea 5                                                                    |
| Q.K1.7.a | Condom can be evaluated by checking the presence of estrange particles on it.                                                                                                                                                                                                                                                                                                                                                                                                                                                                                               | Yes 1<br>No 2<br>Do not know 3                                                                                                                                                          |
| Q.K1.7.b | Which of the statements correspond to correct use of condom?<br><br>a) Use a new condom for every act of vaginal, anal and oral sex.<br>b) Before genital contact, put the condom on the tip of the erect penis with the rolled side out.<br>c) If the condom does not have a reservoir tip, pinch the tip enough to leave a half-inch space for semen to collect.<br>d) After ejaculation and before the penis gets soft, hold the edge of the condom and carefully withdraw.<br>e) Wrap the condom in a tissue and throw it in the trash where others will not handle it. | a) New in every sex act 1<br>b) Condom on erect penis 2<br>c) Ensure space for semen 3<br>d) Remove after ejaculation 4<br>e) Safely throw in a trash 5<br>f) Never interrupt sex act 6 |

|          |                                                                                                                                                                                                                                                                                                                                            |                                                                                                                                                                                                                         |
|----------|--------------------------------------------------------------------------------------------------------------------------------------------------------------------------------------------------------------------------------------------------------------------------------------------------------------------------------------------|-------------------------------------------------------------------------------------------------------------------------------------------------------------------------------------------------------------------------|
|          | <p>f) If you feel the condom break at any point during sex act, continue normally.</p> <p>g) Water-based lubricants might be used if needed</p>                                                                                                                                                                                            | <p>g) Use water-based lubricants 7</p> <p>h) No idea 8</p>                                                                                                                                                              |
| Q.K1.7.c | A condom must be removed immediately after ejaculation and disposed in the kitchen waste bin.                                                                                                                                                                                                                                              | <p>Yes 1</p> <p>No 2</p> <p>Do not know 3</p>                                                                                                                                                                           |
|          | <p><b>Now we are inviting you to answer some question regarding your attitudes about condom use.</b></p> <p>Instructions:</p> <p>Many questions in this section use a ranting scale with 7 levels (good...Bad or Agree...Disagree, or likely.... unlikely). You are requested to circle the number which better describe your opinion.</p> | <p>Example:</p> <p>7 = Agree completely</p> <p>6 = Quite agree</p> <p>5 = Agree slightly</p> <p>4 = Neither agree nor disagree</p> <p>3 = Disagree slightly</p> <p>2 = Quite disagree</p> <p>1= Disagree completely</p> |
| Q.A1.1.a | <p>Using condom at sexual intercourse reduce pleasure.</p> <p><i>Please, cycle the number which describe better your opinion!</i></p>                                                                                                                                                                                                      | <p>Disagree..... Agree</p> <p>1 2 3 4 5 6 7</p>                                                                                                                                                                         |
| Q.A1.1.b | <p>Using condom consistently and correctly is beneficial and reduce the risk of acquiring STI and/or HIV.</p> <p><i>Please, cycle the number which describe better your opinion!</i></p>                                                                                                                                                   | <p>Disagree..... Agree</p> <p>1 2 3 4 5 6 7</p>                                                                                                                                                                         |

|          |                                                                                                                                                       |                                                      |
|----------|-------------------------------------------------------------------------------------------------------------------------------------------------------|------------------------------------------------------|
| Q.A1.3.a | Keeping condom with you in a private and effective place is beneficial.<br><br><i>Please, cycle the number which describe better your opinion!</i>    | Disagree..... Agree<br><br>1   2   3   4   5   6   7 |
| Q.A1.3.b | keeping condoms with you within the validity time has benefits.<br><br><i>Please, cycle the number which describe better your opinion!</i>            | Disagree..... Agree<br><br>1   2   3   4   5   6   7 |
| Q.A1.4.a | Successful negotiation for using condom in a sex act has benefits.<br><br><i>Please, cycle the number which describe better your opinion!</i>         | Disagree.....Agree<br><br>1   2   3   4   5   6   7  |
| Q.A1.5.a | State pre-condition and pre-requisite for sexual intercourse has benefits.<br><br><i>Please, cycle the number which describe better your opinion!</i> | Disagree..... Agree<br><br>1   2   3   4   5   6   7 |
| Q.A1.6.a | Respect to a partner's concerns regarding sex act is important.<br><br><i>Please, cycle the number which describe better your opinion!</i>            | Disagree..... Agree<br><br>1   2   3   4   5   6   7 |
| Q.A1.7.a | Using a new condom at each sex event has benefits.<br><br><i>Please, cycle the number which describe better your opinion!</i>                         | Disagree.....Agree<br><br>1   2   3   4   5   6   7  |
| Q.A1.7.b | Using condom correctly has benefits.<br><br><i>Please, cycle the number which describe better your opinion!</i>                                       | Disagree.....Agree<br><br>1   2   3   4   5   6   7  |

|           |                                                                                                                                                                                                                                    |                                                                                                                                                                                                                                                                         |
|-----------|------------------------------------------------------------------------------------------------------------------------------------------------------------------------------------------------------------------------------------|-------------------------------------------------------------------------------------------------------------------------------------------------------------------------------------------------------------------------------------------------------------------------|
| Q.A1.7.c  | <p>Safe removal and disposal of a condom is important.</p> <p><i>Please, cycle the number which describe better your opinion!</i></p>                                                                                              | <p>Disagree..... Agree</p> <p>1 2 3 4 5 6 7</p>                                                                                                                                                                                                                         |
|           | <p><b>Now we are inviting you to answer some question regarding your Self-efficacy about condom use</b></p> <p>Similar as the previous group of questions, <i>Please, cycle the number which describe better your opinion!</i></p> | <p>Example:</p> <p>7 = Extremely likely/agree</p> <p>6 = Quite likely/agree</p> <p>5 = Slightly likely/agree</p> <p>4 = Neither likely nor unlikely</p> <p>3 = Slightly unlikely/disagree</p> <p>2 = Quite unlikely/disagree</p> <p>1 = Extremely unlikely/disagree</p> |
| Q.SE1.1a  | <p>I am confident to make the decision to use condoms.</p> <p><i>Please, cycle the number which describe better your opinion!</i></p>                                                                                              | <p>Unlikely.....Likely</p> <p>1 2 3 4 5 6 7</p>                                                                                                                                                                                                                         |
| QSE1.2.a  | <p>I am confident to buy or obtain condoms any display point.</p>                                                                                                                                                                  | <p>Unlikely.....Likely</p> <p>1 2 3 4 5 6 7</p>                                                                                                                                                                                                                         |
| Q.SE1.2.b | <p>I am confident to deal with embarrassment when buying or take condoms.</p>                                                                                                                                                      | <p>Unlikely.....Likely</p> <p>1 2 3 4 5 6 7</p>                                                                                                                                                                                                                         |
| Q.SE1.3.a | <p>I am confident to carry condoms discreetly.</p>                                                                                                                                                                                 | <p>Unlikely.....Likely</p> <p>1 2 3 4 5 6 7</p>                                                                                                                                                                                                                         |

|            |                                                                                                         |                                       |
|------------|---------------------------------------------------------------------------------------------------------|---------------------------------------|
| Q.SE1.4.a  | To negotiate contraceptive use with a partner is difficult.                                             | Unlikely.....Likely<br>1 2 3 4 5 6 7  |
| Q.SE1.5.a  | I am confident to convince a partner to use condom as a pre-requisite for sex intercourse.              | Unlikely.....Likely<br>1 2 3 4 5 6 7  |
| Q.SE1.5.b  | I am confident to delay sex if negotiation fails.                                                       | Unlikely.....Likely<br>1 2 3 4 5 6 7  |
| Q.SE1.6.a  | I am confident to listen actively a partner's concerns about pre-conditions for sex intercourse.        | Unlikely.....Likely<br>1 2 3 4 5 6 7  |
| Q.SE1.7.a  | I am confident to use condom correctly.                                                                 | Unlikely.....Likely<br>1 2 3 4 5 6 7  |
| Q.SE1.7.b  | I am confident to removal and disposal condom after use.                                                | Unlikely.....Likely<br>1 2 3 4 5 6 7  |
|            | <b>Now we are inviting you to answer some question regarding Subjective norms about condom use</b>      |                                       |
| Q.SN1.1.a  | Most sexually active students think that it is important to use condom.                                 | Disagree.....Agree<br>1 2 3 4 5 6 7   |
| Q.SN.1.1.b | Most of sexually active students who decide to use condoms are more likely to use continuously.         | Unlikely..... Likely<br>1 2 3 4 5 6 7 |
| Q.SN1.2.a  | Other students obtain condoms for free at health centre, health provider office or by at the chemistry. | Disagree..... Agree<br>1 2 3 4 5 6 7  |

|           |                                                                                   |                                       |
|-----------|-----------------------------------------------------------------------------------|---------------------------------------|
| Q.SN1.3.a | Most students carry condoms in a private place to easily access.                  | Disagree.....Agree<br>1 2 3 4 5 6 7   |
| Q.SN1.4.a | Sexually active peer students negotiate the use of condom with their partner.     | Disagree..... Agree<br>1 2 3 4 5 6 7  |
| Q.SN1.5.a | Sexually active peer students delay sex when negotiation fails.                   | Unlikely..... Likely<br>1 2 3 4 5 6 7 |
| Q.SN1.6.a | Sexually active students actively listen and understand their partner's concerns. | Unlikely..... Likely<br>1 2 3 4 5 6 7 |
| Q.SN1.7.a | Sexually active students use condom correctly.                                    | Disagree.....Agree<br>1 2 3 4 5 6 7   |

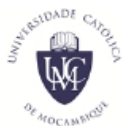

## Evaluation of a sexual transmitted infection prevention programme among university students in Beira city, Central Mozambique

Name of data collector: \_\_\_\_\_ Date of filling: \_\_/\_\_/202\_\_

Collection setting (university/faculty/class) \_\_\_\_\_/\_\_\_\_\_/\_\_\_\_\_

Participant code number \_\_/\_\_/\_\_ Visit number: 0 \_\_ 1 \_\_ 2 \_\_

### Section 4: BO2. University students regularly use STI/HIV screening services

| QN.      | Question                                                                                                                 | Code of possible answer                                                                                              |
|----------|--------------------------------------------------------------------------------------------------------------------------|----------------------------------------------------------------------------------------------------------------------|
|          | <b>Now we are inviting you to answer some question regarding your knowledge about use of STI/HIV screening services.</b> |                                                                                                                      |
| Q.K2.1.a | What of these are consequences of not using STI/HIV screening services? ( <b>circle all possible answers</b> ).          | Transmission of STI/HIV 1<br>Evolution to chronic stage 2<br>Acquire HIV 3<br>Delay treatment 4<br>Hospitalization 5 |
| Q.K2.1.b | Do you agree that using STI/HIV screening services reduce spreading of STIs including HIV.                               | Strongly disagree 1<br>Disagree 2<br>Neither agree nor disagree 3<br>Agree 4                                         |



|           |                                                                                             |                            |   |
|-----------|---------------------------------------------------------------------------------------------|----------------------------|---|
|           |                                                                                             | Strongly agree             | 5 |
| Q.K2.2a   | Which of the following time interval is recommended for regular screening of STI/HIV?       | Once a year                | 1 |
|           |                                                                                             | Every 6 months             | 2 |
|           |                                                                                             | Every 3 months             | 3 |
|           |                                                                                             | Every month                | 4 |
|           |                                                                                             | Whenever you have concerns | 5 |
| Q.RP2.3.a | Are you aware about your risk for STI/HIV acquisition?                                      | Not at all aware           | 1 |
|           |                                                                                             | Slightly aware             | 2 |
|           |                                                                                             | Somewhat aware             | 3 |
|           |                                                                                             | Aware                      | 4 |
|           |                                                                                             | Extremely aware            | 5 |
| Q.RP2.3.b | Do you agree that you should get help from a health advisor very soon for STI/HIV concerns? | Strongly disagree          | 1 |
|           |                                                                                             | Disagree                   | 2 |
|           |                                                                                             | Neither agree nor disagree | 3 |
|           |                                                                                             | Agree                      | 4 |
|           |                                                                                             | Strongly agree             | 5 |
| Q.K2.5.a  | If your HIV test result is positive, how many lines the rapid test device shows?            | None                       | 1 |
|           |                                                                                             | Two, but one-line pale     | 2 |
|           |                                                                                             | Two lines pales            | 3 |
|           |                                                                                             | Two lines distinct         | 4 |
|           |                                                                                             | Don't know                 | 5 |
|           | <b>Now we are inviting you to answer some question concerning your</b>                      |                            |   |

|           |                                                                                                                                                                                                                                                                                                             |                                                                                                                                                                                                                                |
|-----------|-------------------------------------------------------------------------------------------------------------------------------------------------------------------------------------------------------------------------------------------------------------------------------------------------------------|--------------------------------------------------------------------------------------------------------------------------------------------------------------------------------------------------------------------------------|
|           | <p><b>attitude regarding use of STI/HIV screening services.</b></p> <p><i>Instructions:</i></p> <p>Many questions in this section use a rating scale with 7 levels (Good....Bad, or Agree...Disagree, or Likely.... Unlikely). You are requested to circle the number which best describe your opinion.</p> | <p><b>Example:</b></p> <p>7 = Completely agree</p> <p>6 = Quite agree</p> <p>5 = Slightly agree</p> <p>4 = Neither agree nor disagree</p> <p>3 = Slightly disagree</p> <p>2= Quite disagree</p> <p>1 = Completely disagree</p> |
| Q.A2.1.a  | <p>Using STI/HIV screening services is pleasant.</p> <p><i>Please circle the number which describe better your opinion!</i></p>                                                                                                                                                                             | <p>Disagree..... Agree</p> <p>1 2 3 4 5 6 7</p>                                                                                                                                                                                |
| Q.A2.2.a  | <p>Setting up a personal calendar for STI/HIV screening visit has benefits.</p> <p><i>Please circle the number which describe better your opinion!</i></p>                                                                                                                                                  | <p>Disagree..... Agree</p> <p>1 2 3 4 5 6 7</p>                                                                                                                                                                                |
| Q.A2.3.a  | <p>Getting help from health advisor about STI/HIV concerns is beneficial.</p> <p><i>Please circle the number which describe better your opinion!</i></p>                                                                                                                                                    | <p>Disagree..... Agree</p> <p>1 2 3 4 5 6 7</p>                                                                                                                                                                                |
| Q.A.2.3.b | <p>Getting help from health advisors soon is beneficial.</p> <p><i>Please circle the number which describe better your opinion!</i></p>                                                                                                                                                                     | <p>Disagree..... Agree</p> <p>1 2 3 4 5 6 7</p>                                                                                                                                                                                |

|          |                                                                                                                                                                                                                                                             |                                                                                                                                                                                                                                                                        |
|----------|-------------------------------------------------------------------------------------------------------------------------------------------------------------------------------------------------------------------------------------------------------------|------------------------------------------------------------------------------------------------------------------------------------------------------------------------------------------------------------------------------------------------------------------------|
| Q.A2.4.a | <p>Learning about your results regarding STI/HIV has benefits.</p> <p><i>Please, cycle the number which describe better your opinion!</i></p>                                                                                                               | <p>Disagree..... Agree</p> <p>1 2 3 4 5 6 7</p>                                                                                                                                                                                                                        |
| Q.A2.5.a | <p>Accepting test results about your STI/HIV state is beneficial</p> <p><i>Please cycle the number which describe better your opinion!</i></p>                                                                                                              | <p>Disagree..... Agree</p> <p>1 2 3 4 5 6 7</p>                                                                                                                                                                                                                        |
| Q.A2.6.a | <p>Going to the health centre for treatment and follow up to STI/HIV has benefits.</p> <p><i>Please, cycle the number which describe better your opinion!</i></p>                                                                                           | <p>Disagree..... Agree</p> <p>1 2 3 4 5 6 7</p>                                                                                                                                                                                                                        |
| Q.A2.7.a | <p>Regular visit to the health advisor for STI/HIV counselling and testing has benefits.</p> <p><i>Please, cycle the number which describe better your opinion!</i></p>                                                                                     | <p>Disagree..... Agree</p> <p>1 2 3 4 5 6 7</p>                                                                                                                                                                                                                        |
|          | <p><b>Now we are inviting you to answer some question concerning your self-efficacy about use of STI/HIV screening services.</b></p> <p>Similar as the previous group of questions, <i>Please, cycle the number which describe better your opinion!</i></p> | <p>Example:</p> <p>7 = Extremely likely/agree</p> <p>6 = Quite likely/agree</p> <p>5 = Slightly likely/agree</p> <p>4 = Neither likely nor unlikely</p> <p>3 = Slightly unlikely/disagree</p> <p>2 = Quite unlikely/disagree</p> <p>1= Extremely unlikely/disagree</p> |

|                        |                                                                                                                          |                                       |
|------------------------|--------------------------------------------------------------------------------------------------------------------------|---------------------------------------|
| Q.SE2.2.a              | I am able to setup a calendar to visit a health advisor services for STI/HIV counselling and testing.                    | Unlikely..... Likely<br>1 2 3 4 5 6 7 |
| Q.SE2.3.a              | I am confident to tell my concerns about STI/HIV to the health provider.                                                 | Unlikely..... Likely<br>1 2 3 4 5 6 7 |
| Q.SE2.3.b <sub>1</sub> | I am confident to deal with fear of being judged (eg. cheating).                                                         | Unlikely..... Likely<br>1 2 3 4 5 6 7 |
| Q.SE2.3.b <sub>2</sub> | I am confident to inform my current sexual partner.                                                                      | Unlikely..... Likely<br>1 2 3 4 5 6 7 |
| Q.SE2.4.a              | I am confident to pick up results from to the health advisor office.                                                     | Unlikely..... Likely<br>1 2 3 4 5 6 7 |
| Q.SE2.5.a              | I am confident to deal with having STI/HIV infection.                                                                    | Unlikely..... Likely<br>1 2 3 4 5 6 7 |
| Q.SE2.5.b              | I am confident to deal with emotional reactions about the results.                                                       | Unlikely..... Likely<br>1 2 3 4 5 6 7 |
| Q.SE2.6.a              | I am confident to go to the health centre for treatment and follow up if needed.                                         | Unlikely..... Likely<br>1 2 3 4 5 6 7 |
| Q.SE2.7.a              | I am confident to follow my calendar continuously.                                                                       | Unlikely..... Likely<br>1 2 3 4 5 6 7 |
|                        | <b>Now we are inviting you to answer some question regarding subjective norms about use of STI/HIV testing services.</b> |                                       |

|           |                                                                                                                 |                                                                                                       |
|-----------|-----------------------------------------------------------------------------------------------------------------|-------------------------------------------------------------------------------------------------------|
|           | Similar as the previous group of questions; <i>Please, cycle the number which describe better your opinion!</i> |                                                                                                       |
| Q.SN2.2.a | Other students like me are following their personal plan for STI/HIV screening.                                 | Disagree..... Agree<br>1 2 3 4 5 6 7                                                                  |
| Q.SN2.3.a | Other students like me usually go to the health provider for STI/HIV complains.                                 | Unlikely..... Likely<br>1 2 3 4 5 6 7                                                                 |
| Q.SN2.6.a | Other people with STI/HIV go to the health centre for treatment and follow up.                                  | Disagree..... Agree<br>1 2 3 4 5 6 7                                                                  |
| Q.SN2.7.a | Other students will follow their calendar continuously.                                                         | Unlikely..... Likely<br>1 2 3 4 5 6 7                                                                 |
| Q.U2.1    | Have ever visited a VCT?                                                                                        | Yes 1<br>No 2<br>Do not remember 3                                                                    |
| Q.U2.2    | When was the last time you visited a VCT?                                                                       | 1 to 4 weeks ago 1<br>1 to 3 months ago 2<br>4 to 6 months ago 3<br>A year ago 4<br>Do not remember 5 |
